# Supplementary material for: Effects of halogen substitution on the properties of eight- and nine-vertex closo-boranes
Source: Royal Society of Chemistry journal article supplement (doi:10.1039/b716323a), 2008-01-01
Supplement: b716323a.pdf [file b716323a.pdf]

# Supporting Information: Effects of Halogen Substitution on the Properties of Eight- and Nine-Vertex *closo*-Boranes

*Clémence Corminboeuf,\*<sup>a,b</sup> Matthew D. Wodrich,<sup>a</sup> R. Bruce King,<sup>a</sup>  
and Paul von Ragué Schleyer\*<sup>a</sup>*

<sup>a</sup>Department of Chemistry, Center for Computational Chemistry, University of Georgia,  
Athens, Georgia, USA 30602.

<sup>b</sup>Laboratory for Computational Molecular Design, Ecole Polytechnique Fédérale de Lausanne  
(EPFL), 1015 Lausanne, Switzerland.

To whom correspondence should be addressed. E-mail: [clemence.corminboeuf@epfl.ch](mailto:clemence.corminboeuf@epfl.ch),  
[schleyer@chem.uga.edu](mailto:schleyer@chem.uga.edu)

Dedicated to Kenneth Wade on the occasion of his 75<sup>th</sup> birthday.

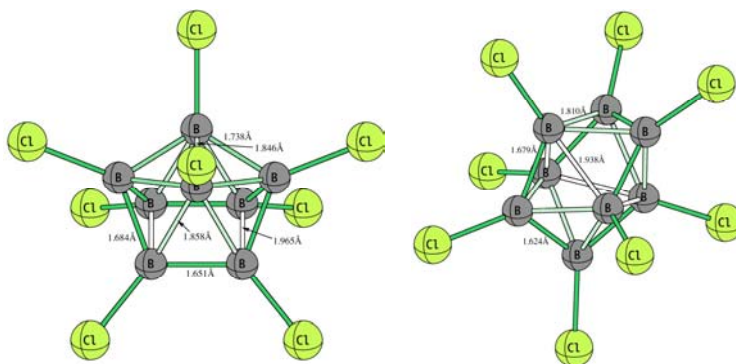

**Figure S1.** Structures of the  $B_8Cl_8^{2-}$  species:  $C_{2v}$  (left) and  $D_{2d}$  (right).

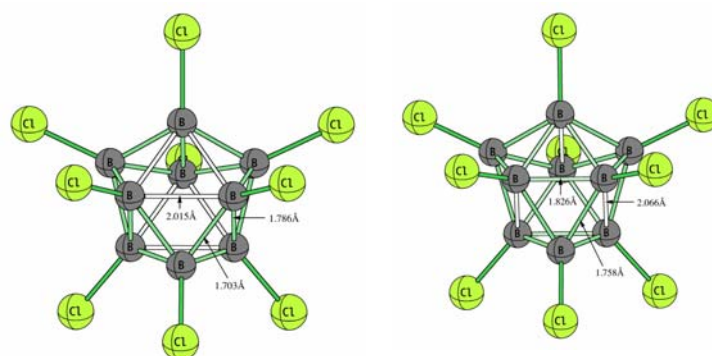

**Figure S2.** Structures of the  $D_{3h}$   $B_9Cl_9^{2-}$  (left) and  $D_{3h}$   $B_9Cl_9$  (right).
